# Supplementary material for: Charge assisted chiral hybrid H-bonded molecular networksElectronic supplementary information (ESI) available: synthetic details. See http://www.rsc.org/suppdata/cc/b3/b301467n/
Source: Royal Society of Chemistry journal article supplement (doi:10.1039/b301467n), 2003-05-06
Supplement: b301467n.doc [file b301467n.doc]

# Supplementary data

The preparation of **1**2+-2TsO- was previously reported.1 The synthesis of optically pure tectons **2**2+-2 TsO- (42 % yield, []D = +68.4° (c = 1.0 Ml-1, MeOH)) and **3** 2+(31 % yield, []D = -68.8° (c = 1.0, MeOH)) was achieved upon heating under argon flow at 170 °C for 7 h. a 1/2 mixture of 1,4-dicyanobenzene and **4** -TsOH (TsOH = *p*-toluensulfonic acid) or **5**-TsOH respectively prepared by treatment of **4** and **5** with TsOH in Et2O at 0 °C.

All co-crystallisations were performed in tubes at room temperature. Upon slow diffusion through a H2O layer (1 ml) of an aqueous solution (2 ml) of **1**2+-2TsO- (9.4 mg, 8 mM)into an aqueous solution (2 ml) of Na2Fe(CN)5NO (4.2 mg, 8 mM) slightly brownish single-crystals were obtained in quantitative yield over night. The same procedure was followed in the case of **2**2+-2Cl- or **3**2+-2Cl- (6.32 mg, 8 mM).

1 O. Félix, M. W. Hosseini, A. De Cian, J. Fischer, *New J. Chem.*, **1997**, *21*, 285.
